# Supplementary material for: Electric field tunable band-gap crossover in black(blue) phosphorus/g-ZnO van der Waals heterostructures
Source: Royal Society of Chemistry journal article supplement (doi:10.1039/c7ra06097a), 2017-01-01
Supplement: c7ra06097a1.pdf [file c7ra06097a1.pdf]

Supplementary Information (SI) of “Electric field tunable band-gap  
crossover in black(blue) phosphorus/g-ZnO van der Waals  
heterostructures”

Wei Zhang<sup>1,2</sup>, Lifa Zhang<sup>1,a</sup>

<sup>1</sup>Jiangsu Key Laboratory for Numerical Simulation of Large Scale Complex Systems,  
Department of Physics, Nanjing Normal University, Nanjing 210023, China

<sup>2</sup>Physicochemical Group of Department of Criminal Science and Technology,  
Nanjing Forest Police College, Nanjing 210023, China

<sup>a</sup> Corresponding author: phyzlf@njnu.edu.cn

### Outline

|                                                                         |   |
|-------------------------------------------------------------------------|---|
| <b>SI.1:</b> Convergence tests.....                                     | 2 |
| <b>SI.2:</b> Other typical patterns of heterostructures.....            | 5 |
| <b>SI.3:</b> Band structures of isolated black-p, g-ZnO and blue-p..... | 6 |
| <b>SI.4:</b> Calculations of differential charge density.....           | 7 |
| <b>SI.5:</b> Evolution of band-gap of blue-p/g-ZnO with $E$ .....       | 7 |

### SI.1: Convergence tests.

black-p/g-ZnO

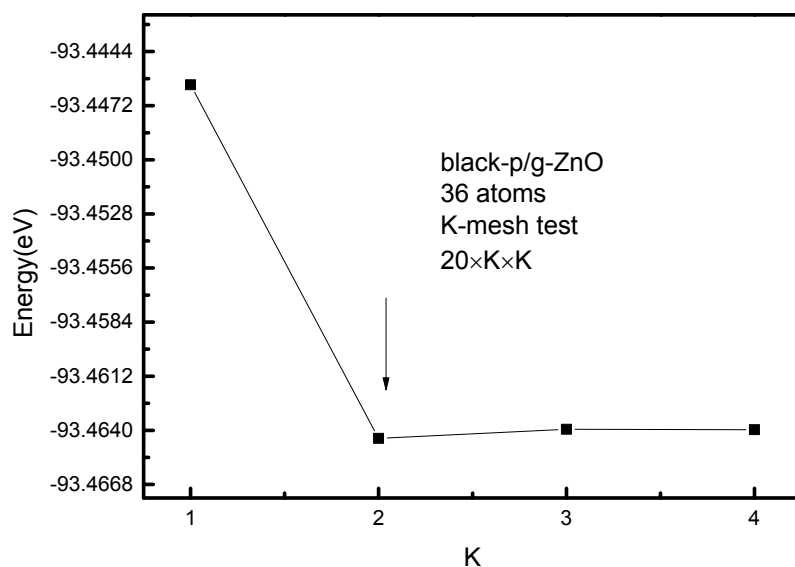

Fig. S1.1 Change of energy of black-p/g-ZnO with k-point meshes (20×K×K).

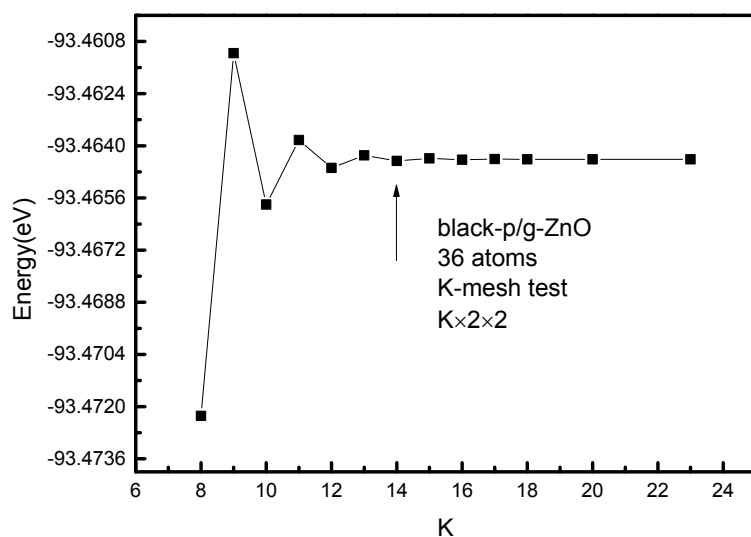

Fig. S1.2 Change of energy of black-p/g-ZnO with k-point meshes (K×2×2).

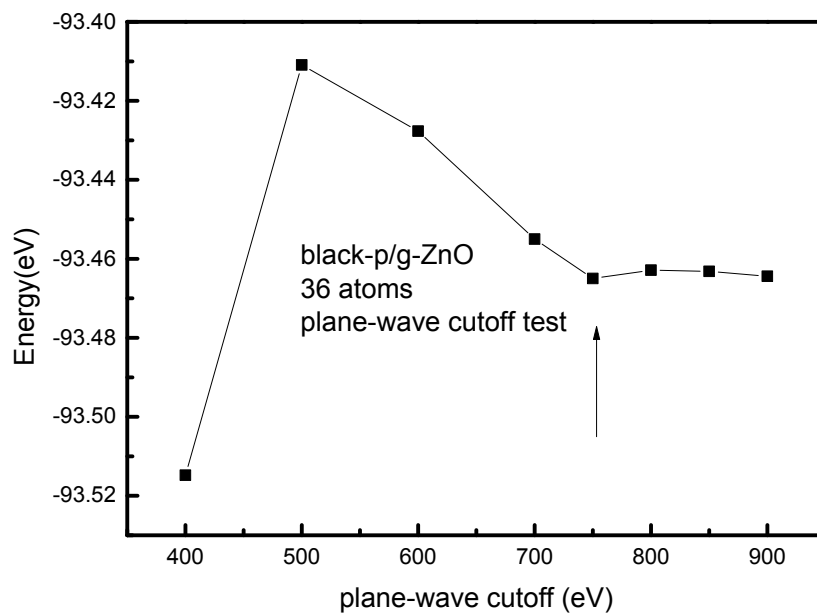

Fig. S1.3 Change of energy of black-p/g-ZnO with plane-wave cutoffs.

blue-p/g-ZnO

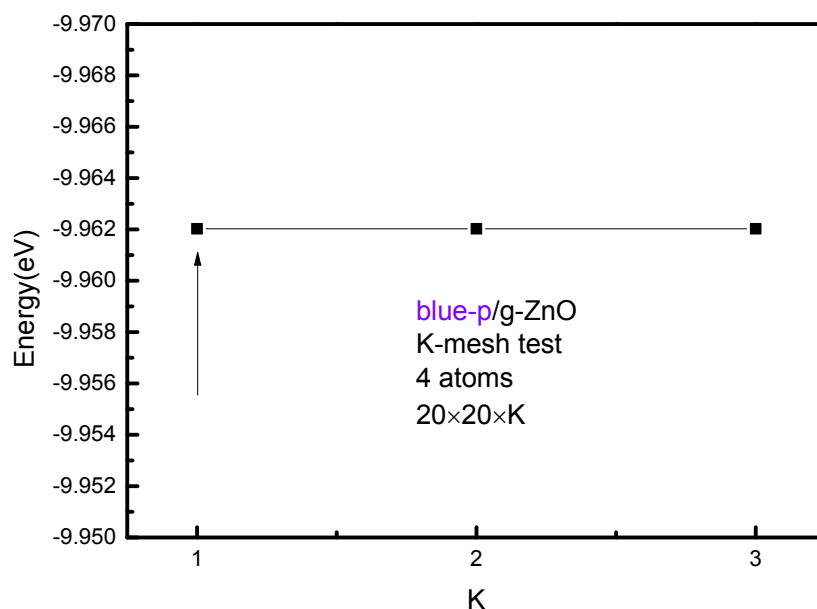

Fig. S1.4 Change of energy of blue-p/g-ZnO with k-point meshes (20×20×K).

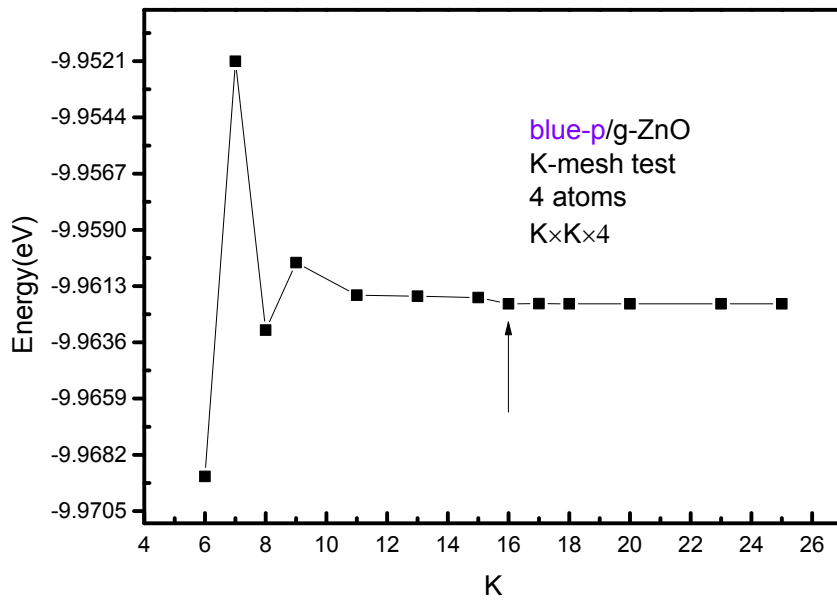

Fig. S1.5 Change of energy of blue-p/g-ZnO with k-point meshes (K×K×4).

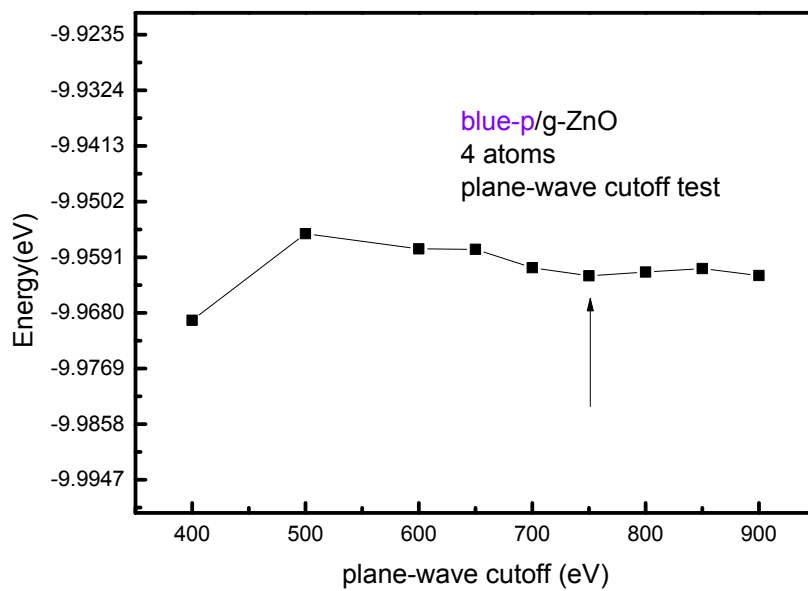

Fig. S1.6 Change of energy of blue-p/g-ZnO with plane-wave cutoffs.

SI.2: Other typical patterns of heterostructures.

black-p/g-ZnO

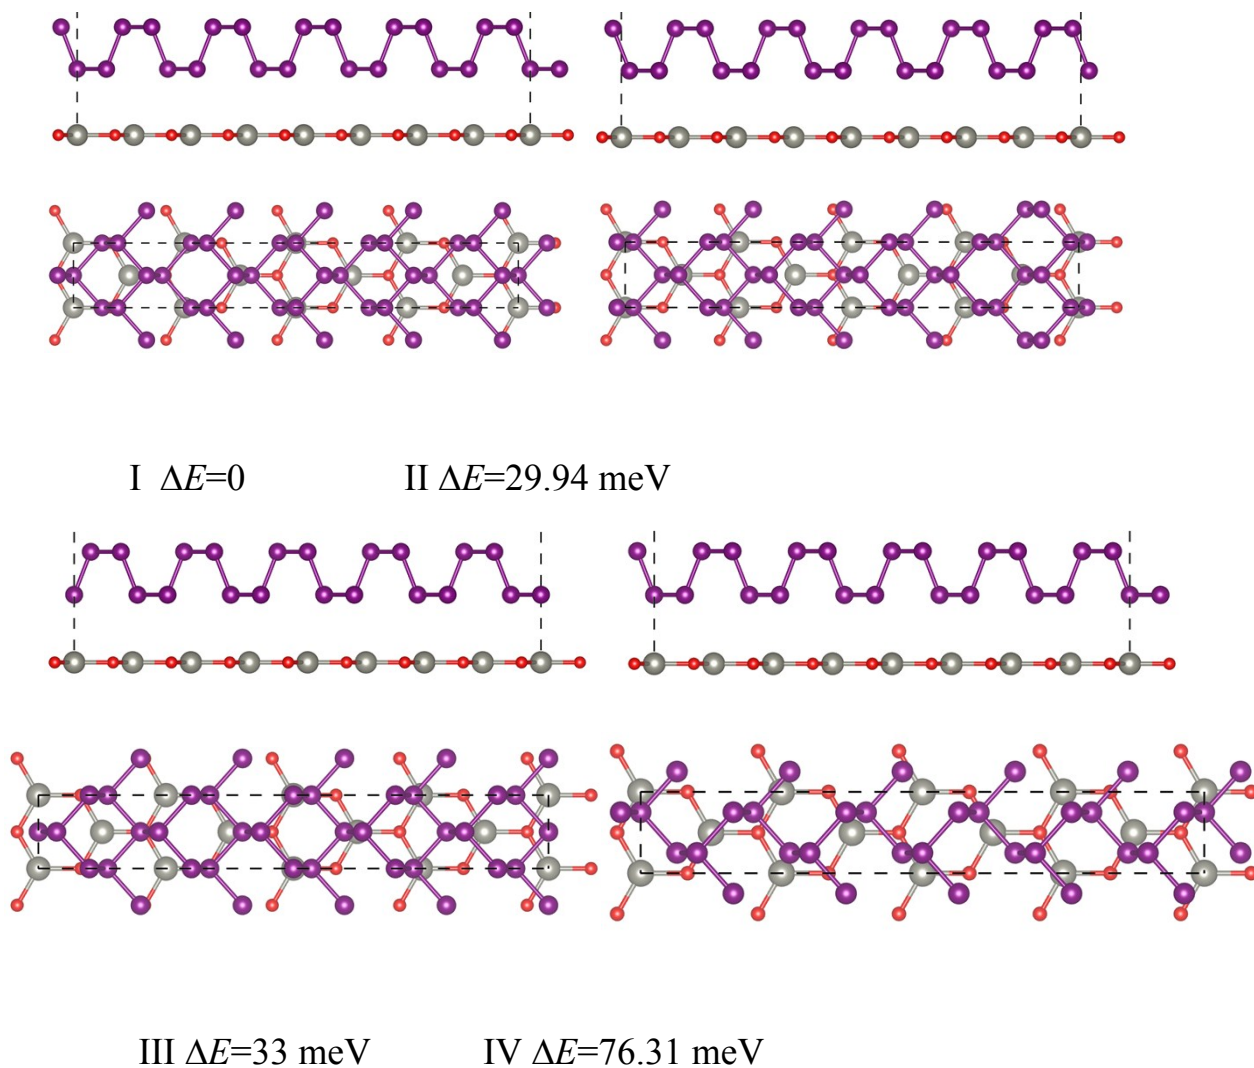

Fig. S2.1 Relative energy of other typical patterns of black-p/g-ZnO.

blue-p/g-ZnO

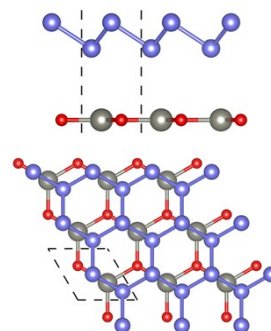

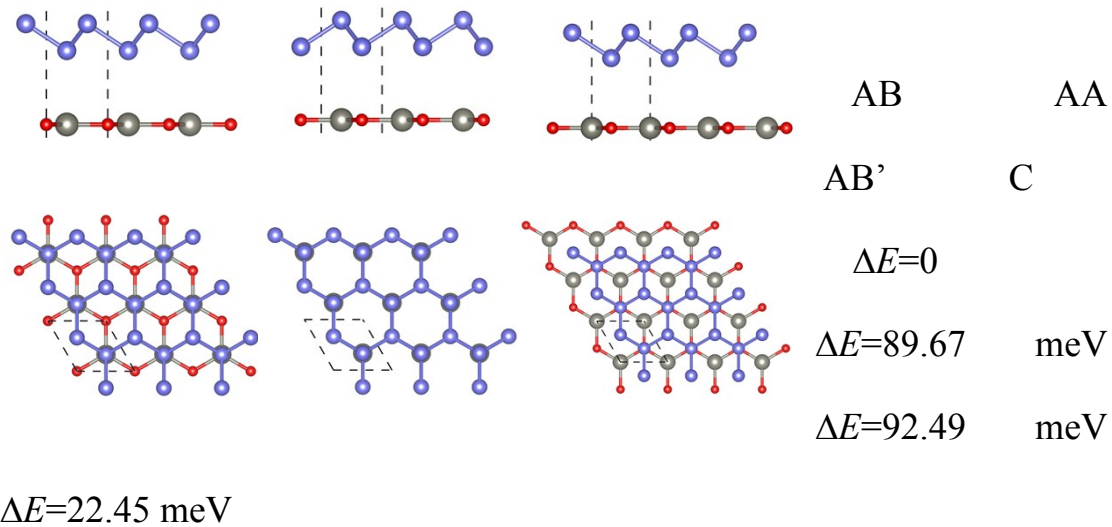

Fig. S2.2 Relative energy of other typical patterns of blue-p/g-ZnO.

**SI.3:** Band structures of isolated black-p, g-ZnO and blue-p.

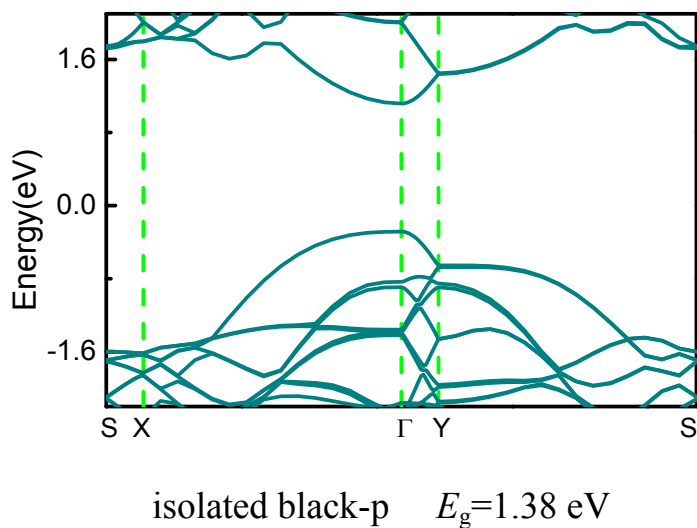

Fig. S3.1 Band structures of isolated black-p.

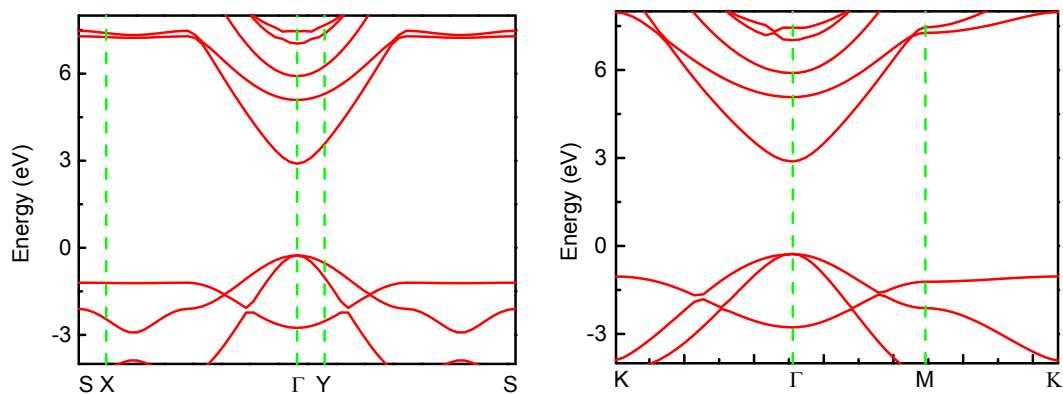

isolated g-ZnO  $E_g=3.29$  eV

Fig. S3.2 Band structures of isolated g-ZnO.

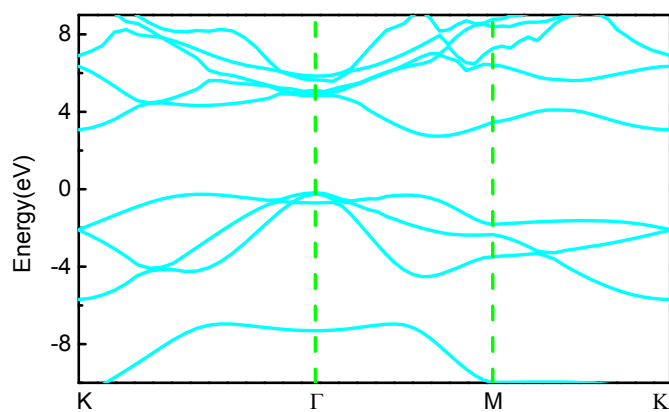

isolated blue-p  $E_g=2.86$  eV

Fig. S3.3 Band structures of isolated blue-p.

#### SI.4: Calculations of differential charge density.

$$\rho(x,y,z)$$

$\Delta\rho(z)$  without  $E$

$$\Delta\rho(z)=\int\rho(\text{blue-p/g-ZnO})dxdy-\int\rho(\text{blue-p})dxdy-\int\rho(\text{g-ZnO})dxdy \text{ (Eq. S4.1)}$$

$\rho(\text{blue-p})$  and  $\rho(\text{g-ZnO})$  are the charge density of blue-p and g-ZnO single-layer in the supercell of heterostructure, respectively.  $(x,y,z)$  denote the positions in the supercell.

$\Delta\rho_E(z)$  with  $E$

$$\Delta\rho_E(z)=\int\rho_E(\text{blue-p/g-ZnO})dxdy-\int\rho(\text{blue-p/g-ZnO})dxdy \text{ (Eq. S4.2)}$$

$\rho_E(\text{blue-p/g-ZnO})$  and  $\rho(\text{blue-p/g-ZnO})$  are the charge density of blue-p/g-ZnO with and without  $E$ .

**SI.5:** Evolution of band-gap of blue-p/g-ZnO with  $E$ .

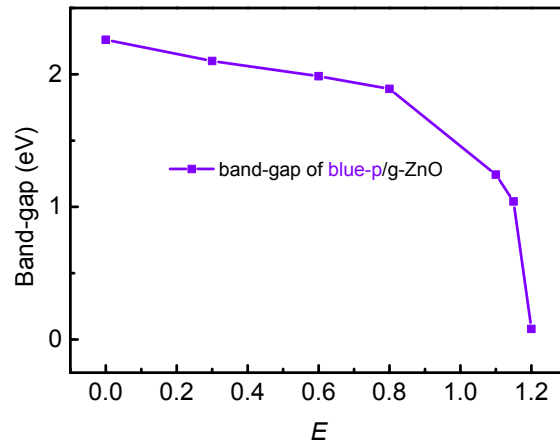

Fig. S5. Evolution of band-gap of blue-p/g-ZnO with  $E$ .
